# Supplementary material
Source: PubMed Central journal article supplement (PMC5486983)
Supplement: NIHMS868344-supplement-Supporting_Information.pdf [file NIHMS868344-supplement-Supporting_Information.pdf]

## Supporting Information

### **Biosynthesis of Modular Ascarosides in *C. elegans***

*Oishika Panda, Allison E. Akagi, Alexander B. Artyukhin, Joshua C. Judkins, Henry H. Le, Parag Mahanti, Sarah M. Cohen, Paul W. Sternberg, and Frank C. Schroeder\**

anie\_201700103\_sm\_miscellaneous\_information.pdf

## **Table of Contents**

|                                 |            |
|---------------------------------|------------|
| <b>1. Supporting Methods</b>    | <b>S2</b>  |
| <b>2. Supporting Figures</b>    | <b>S5</b>  |
| <b>3. Supporting Table</b>      | <b>S11</b> |
| <b>4. Supporting References</b> | <b>S12</b> |

**C. elegans Strains.** Wild type (N2, Bristol), FX04381 *dhs-13(tm4381)*, FX06263 C24A3.4(*tm6263*), FX03584 *ndx-9(tm3584)*, VC754 *ctl-2(ok1137)*, RB2147 *acs-13(ok2861)*, RB2452 *acs-14(ok3391)*, GS2477 *arIs37*; *cup-5(ar465)*; *dpy-20(e1282)*, RB1080 *haf-4(ok1042)*, VC32 *haf-9(gk23)*, VC893 *atg-18 (gk378)*, GH10 *glo-1 (zu437)*, RB811 *glo-4(ok623)*, RB662 *apb-3(ok429)*, FX06781 *acs-7(tm6781)*, FCS1 *daf-22(ok693)*. Some strains were obtained from the Caenorhabditis Genetics Center (CGC), USA, and the National BioResource Project (NBRP), Japan. GH10 was kindly provided by D. Gems and *daf-22(ok693)* was a gift from H. Y. Mak. See Table S1 for a list of *O*-acyltransferase mutants. FCS10 *acs-7(tm6781)* was obtained by outcrossing FX06781 10x against GE1710 *rol-6(e187);unc-4(e120)*. FCS10 was used for all experiments reported for *acs-7(tm6781)*. Worms were maintained on Nematode Growth Medium (NGM) plates seeded with *E. coli* OP50 or HB101.

**Nematode Culture and Extraction.** Mixed stage worms from a populated 10 cm NGM agar plate seeded with *E. coli* OP50 were washed into 25 ml of S-complete medium and fed OP50 on days 1, 3 and 5 for a 7-day culture period, while shaking at 22 °C, 220 rpm. The cultures were then centrifuged and worm pellets and supernatant frozen separately, lyophilized and extracted with 35 mL of 95% ethanol at room temperature for 12 h. The extracts were dried *in vacuo*, resuspended in 200 µL methanol and analyzed by LC/MS. All cultures were grown in at least two biological replicates.

**Mass Spectrometric Analysis.** High resolution LC-MS analysis was performed on a Dionex 3000 UPLC coupled with a Thermo Q Exactive high-resolution mass spectrometer as described previously.<sup>[1]</sup> Metabolites were separated using water–acetonitrile gradient on Agilent Zorbax Eclipse XDB-C18 column (150 mm x 2.1 mm, particle size 1.8 µm) maintained at 40 °C. Solvent A: 0.1% formic acid in water; Solvent B: 0.1% formic acid in acetonitrile. A/B gradient started at 5% B for 5 min after injection and increased linearly to 100% B at 12.5 min. Most ascarosides were detected as [M-H]<sup>-</sup> ions or [M+Cl]<sup>-</sup> adducts in the negative ionization mode (spray voltage 3 kV) and confirmed based on their high-resolution masses (< 1 ppm), fragmentation spectra, and comparison of retention times with those of synthetic standards.

Low resolution LC-MS was performed using the Agilent 1100 Series HPLC system equipped with an Agilent Eclipse XDB-C18 column (250 mm x 9.4 mm, particle size 5 µm), connected to a Quattro II or Quattro Ultima mass spectrometer.<sup>[2]</sup> Solvent A: 0.1% acetic acid in water; Solvent B: 0.1% acetic acid in acetonitrile. A/B gradient started at 5% B for 5 min after injection and increased linearly to 100% B over a period of 40 min. Ascarosides were detected as [M-H]<sup>-</sup> ions in the negative ionization mode (spray voltage 3.5 kV, cone voltage -40 V) and confirmed based on comparison of retention times with those of synthetic standards.

**Ascr#1 Feeding Experiment.** Mixed stage *daf-22(ok693)* worms from a populated 10 cm NGM agar plate seeded with *E. coli* OP50 were washed into two flasks containing 10 ml of S-complete medium and 2% HB101. One flask additionally contained 10 µM of synthetic ascr#1. HB101 was added on days 1, 3 and 5 for a 7-day culture period, while shaking at 22 °C, 220 rpm. The medium was then collected, processed, and analyzed by high-resolution HPLC-MS as described above, revealing production of icas#1. None of the other known ascarosides were observed. These results are consistent with an earlier study in which ascr#3 was fed to *daf-22* worms and production of icas#3 was observed.<sup>[2]</sup>



reaction mixture was diluted with a 1:1 mixture of ethyl acetate and 0.1 M aqueous HCl (2 mL), and the organic layer was collected and then washed two additional times with 1 mL of 0.1 M HCl. The organic layer was dried and dissolved in 625  $\mu$ L of a mixture of DMF and aqueous 10 mM potassium phosphate (4:1), containing the sodium salt of coenzyme A (2  $\mu$ mol), and stirred for 16 hours at room temperature under argon. Subsequently, ascr#9-SCoA was isolated by reverse phase HPLC, using acetonitrile and water, both containing 0.1% acetic acid. A gradient was used starting with 1% acetonitrile for 5 minutes, followed by a linear gradient to 100% acetonitrile over 27.5 minutes. After 2.5 minutes at 100% acetonitrile, the column was re-equilibrated at 1% acetonitrile for 5 minutes. NMR spectra of the purified compound were identical to those published previously.<sup>[3]</sup>

**Microscopy.** For LysoTracker staining we followed a published protocol.<sup>[4]</sup> 0.5 ml of 2  $\mu$ M LysoTracker Deep Red (obtained from Thermo Fisher as 1 mM stock solution in DMSO) diluted in M9 buffer was added to an NGM plate seeded with *E. coli* OP50 and incubated in the dark at 20 °C for 24 h. Worms were then added to the plate and allowed to grow overnight in the dark. For imaging, worms were removed from the plate and transferred onto a glass slide with a thin agarose pad containing sodium azide or levamisole to immobilize worms during imaging. Microscopic analysis was performed with Leica TCS SP5 laser scanning confocal microscope. GFP was excited with 488 nm Argon laser line and the emission detector was set at 500-550 nm. LysoTracker Red stain was excited with 561 nm diode-pumped solid state laser, while the detector was set at 570-650 nm. Images were taken at 1024x1024 pixel resolution and 100-400 Hz scanning rate. Dry 40x/0.85 and oil 63x/1.4 objectives were used.

## Supporting Figures

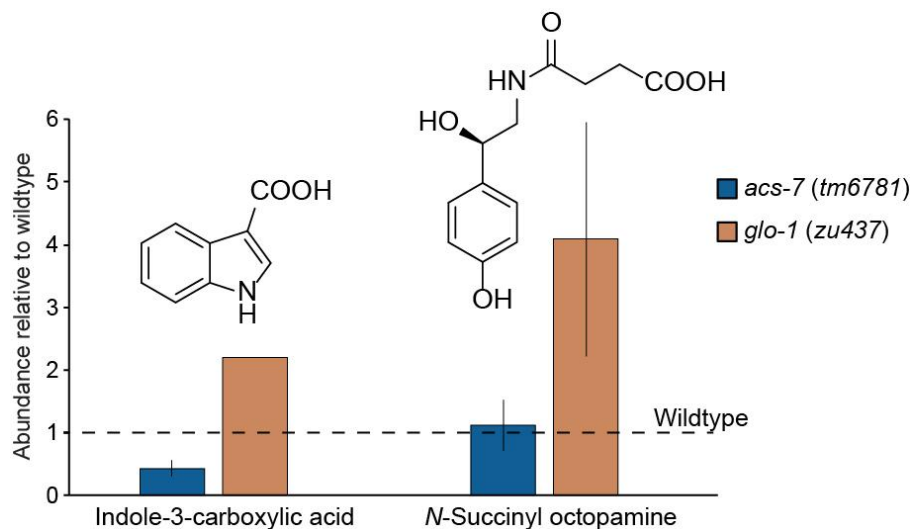

**Figure S1.** Relative abundances of indole-3-carboxylic acid and *N*-succinyl octopamine in *acs-7* and *glo-1* mutants, as determined by negative-ion ESI HPLC-MS. Samples were prepared from synchronized mixed stage cultures as described above (for measurement of indole-3-carboxylic acid) or L1-stage larvae that were incubated for 2.5 days (for measurement of *N*-succinyl octopamine).<sup>[5]</sup> Error bars represent standard deviations of two biological replicates.

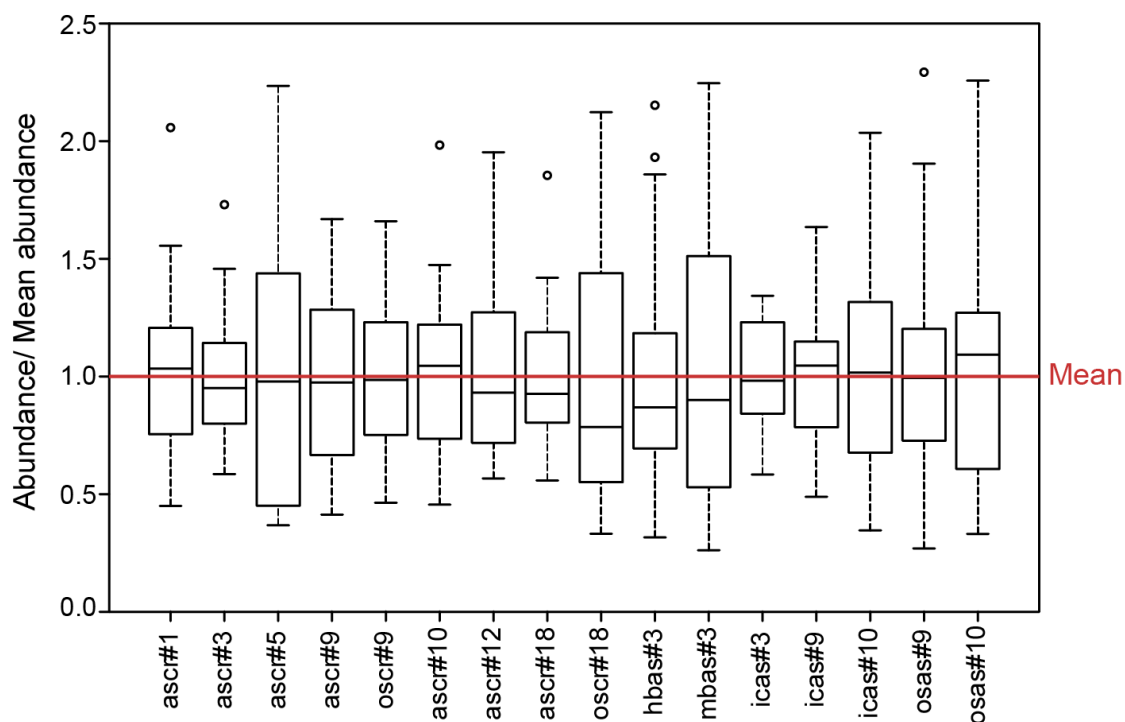

**Figure S2.** Box plot showing variation in ascaroside abundance in wildtype (N2) normalized to mean abundance for each ascaroside (data from 30 independent biological replicates). The horizontal line within each box indicates the median, boundaries of the box indicate 25<sup>th</sup> (Q1) and 75<sup>th</sup> (Q3) percentile, and the whiskers indicate the highest and lowest values of the results. Outliers (values less than Q1 or greater than Q3 by more than 1.5 times the interquartile range) are indicated by hollow black circles.

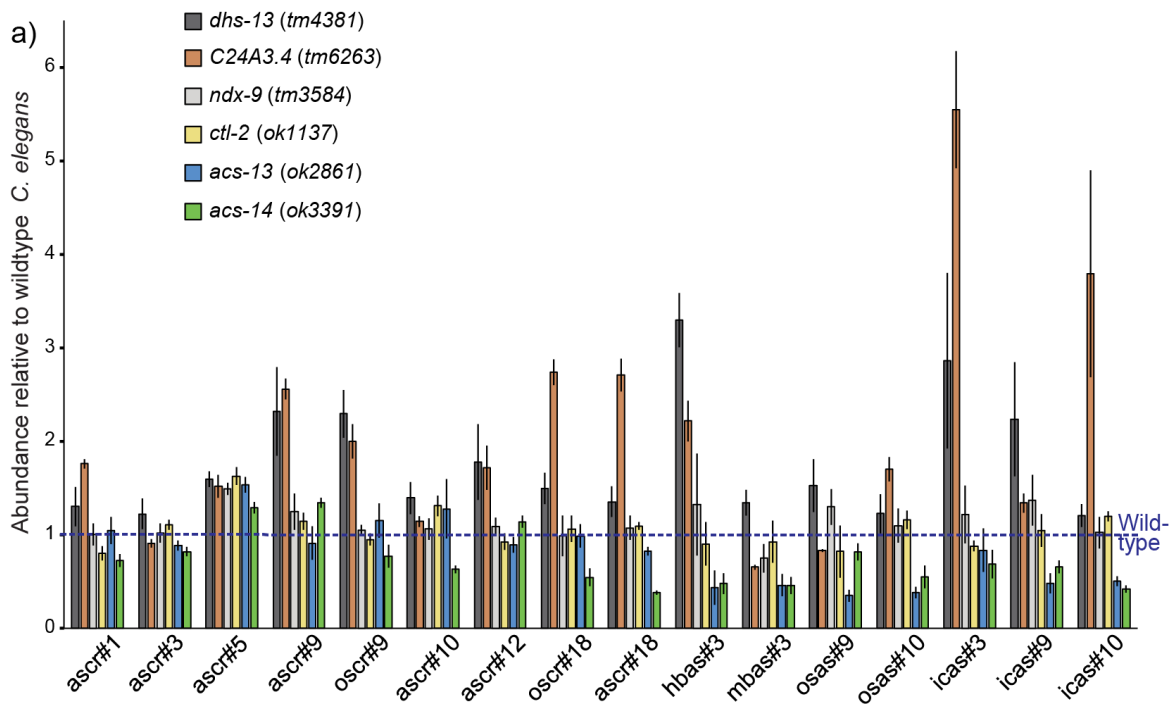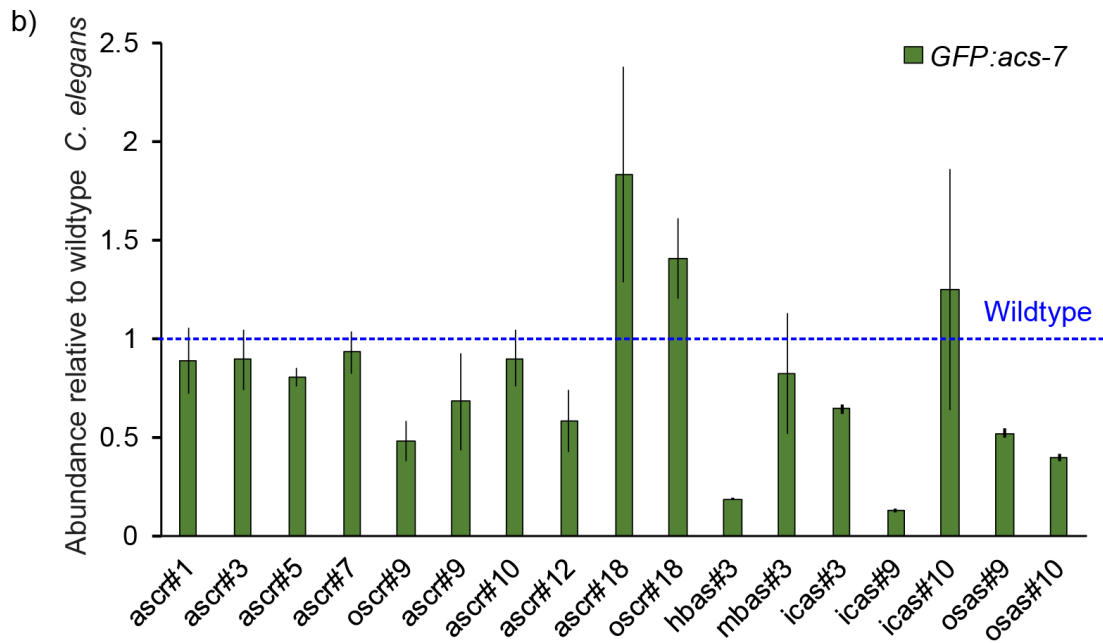

**Figure S3.** Relative abundances of ascarosides in knock-out mutants of putative peroxisome-targeted genes (a) and transgenic worms carrying *acs-7p::gfp::acs-7* in *acs-7* mutant background (b), as determined by negative-ion ESI HPLC-MS. Error bars represent standard error of at least three biological replicates.



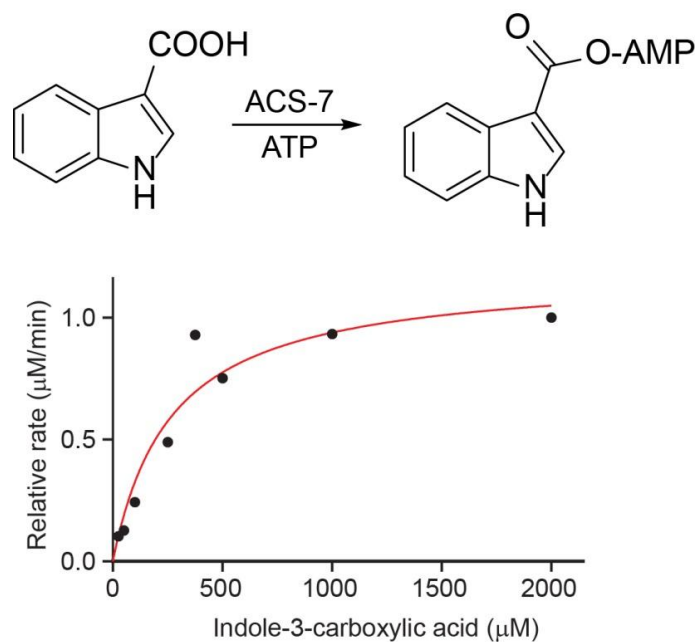

**Figure S4.** Steady-state kinetics for ACS-7 operating on indole-3-carboxylic acid,  $K_m = 270 \pm 90 \mu\text{M}$  at 25 °C.

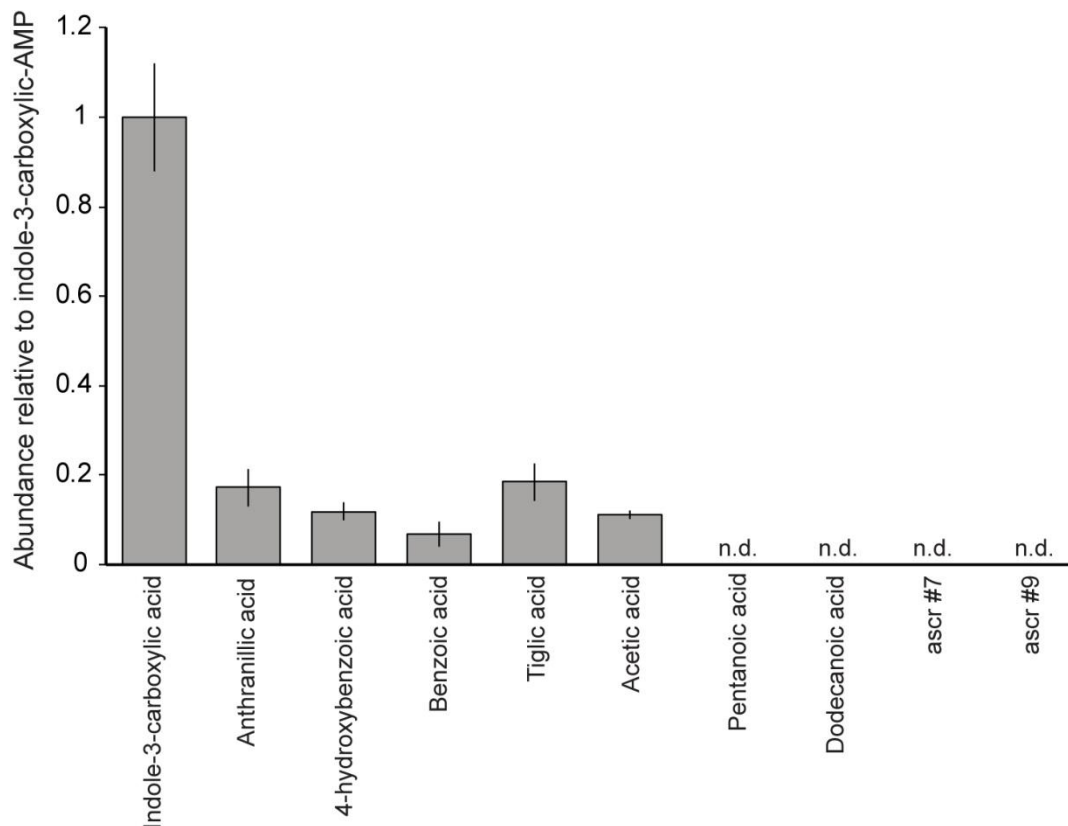

**Figure S5.** Carboxylic acid adenylation screen for ACS-7. Test substrates were analyzed by negative-ion ESI HPLC-MS after 45 min incubations at 25 °C (see Methods). Relative abundances were calculated from MS peak areas and do not account for differences in ionization efficiency. Error bars represent standard deviation. n.d., not detected.

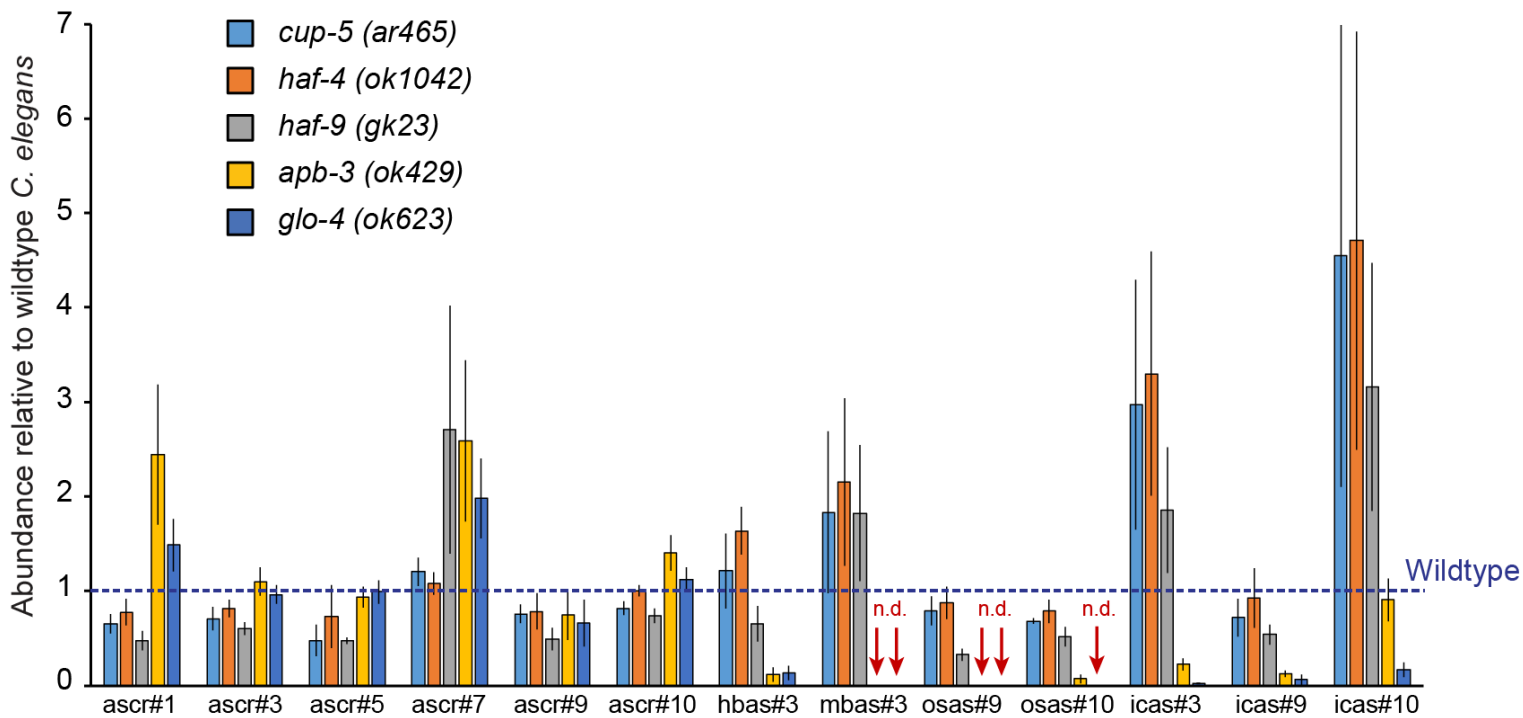

**Figure S6.** Relative abundances of ascarosides, as determined by negative-ion ESI HPLC-MS, in *glo-4(ok623)* and *apb-3(ok429)* mutants, in which acidic LRO formation is reduced, but not abolished, as well as *cup-5(ar465)*, *haf-4(ok1042)* and *haf-9(gk23)* mutants, which are defective in the formation of non-acidic gut granules, but have normal acidic LROs. Error bars represent standard error of four biological replicates. n.d. not detected.

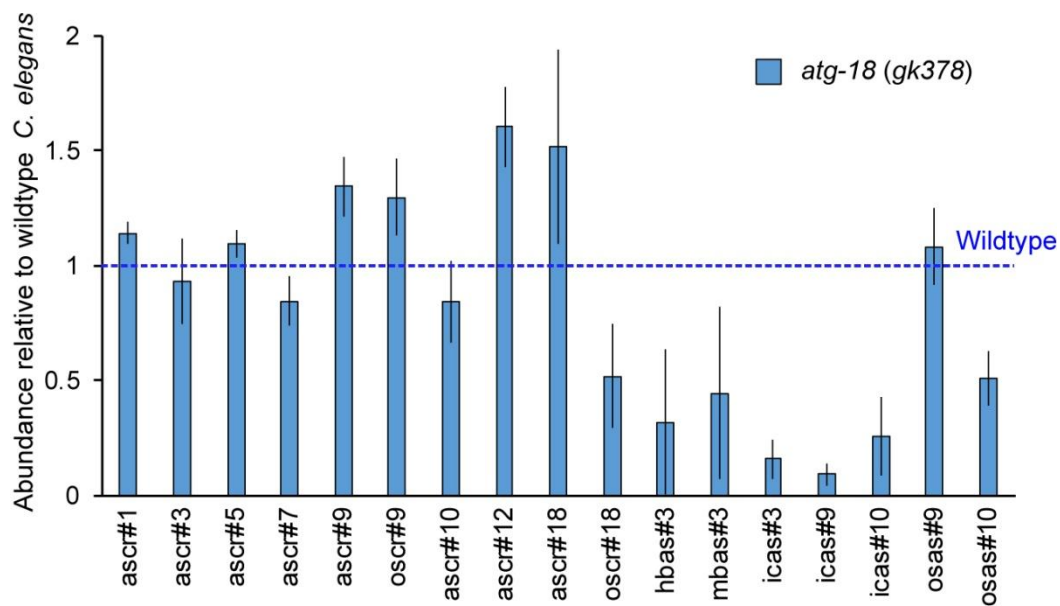

**Figure S7.** Relative abundances of ascarosides in autophagy-deficient *atg-18* mutants, as determined by negative-ion ESI HPLC-MS. Error bars represent standard error of three biological replicates.

## Supporting Table

**Table S1. List of *O*-acyltransferase mutants screened.**

| <b>Gene</b>                   | <b>Strain</b> | <b>Source</b>            |
|-------------------------------|---------------|--------------------------|
| <i>ndg-4</i> (sa529)          | JT529         | Deletion mutant from CGC |
| <i>nrf-6</i> (sa525)          | JT525         | Deletion mutant from CGC |
| <i>oac-11</i> (gk531381)      | VC40243       | Million Mutant Project   |
| <i>oac-14</i> (gk519224)      | VC40217       | Million Mutant Project   |
| <i>oac-14</i> (gk786954)      | VC40738       | Million Mutant Project   |
| <i>oac-16</i> (gk914989)      | VC40988       | Million Mutant Project   |
| <i>oac-20</i> (gk256989)      | VC10128       | Million Mutant Project   |
| <i>oac-23</i> (gk445127)      | VC30240       | Million Mutant Project   |
| <i>oac-27</i> (gk694121)      | VC40561       | Million Mutant Project   |
| <i>oac-29</i> (gk646323)      | VC40455       | Million Mutant Project   |
| <i>oac-3</i> (gk252641)       | VC20209       | Million Mutant Project   |
| <i>oac-34</i> (gk652397)      | VC40469       | Million Mutant Project   |
| <i>oac-35</i> (gk883174)      | VC40922       | Million Mutant Project   |
| <i>oac-36</i> (gk124636)      | VC20551       | Million Mutant Project   |
| <i>oac-38</i> (gk648702)      | VC40461       | Million Mutant Project   |
| <i>oac-39</i> (gk145)         | VC247         | Deletion mutant from CGC |
| <i>oac-4</i> (gk363869)       | VC20633       | Million Mutant Project   |
| <i>oac-40</i> (gk242459)      | VC20235       | Million Mutant Project   |
| <i>oac-41</i> (gk242464)      | VC20211       | Million Mutant Project   |
| <i>oac-41</i> (gk766757)      | VC40696       | Million Mutant Project   |
| <i>oac-42</i> (WBVar00026015) | CB4856        | Wild isolate             |
| <i>oac-43</i> (gk737013)      | VC40638       | Million Mutant Project   |
| <i>oac-49</i> (gk264099)      | VC20294       | Million Mutant Project   |
| <i>oac-5</i> (gk398429)       | VC30020       | Million Mutant Project   |
| <i>oac-50</i> (gk402144)      | VC20784       | Million Mutant Project   |
| <i>oac-51</i> (gk533438)      | VC40246       | Million Mutant Project   |
| <i>oac-54</i> (gk684785)      | VC40540       | Million Mutant Project   |
| <i>oac-6</i> (gk735518)       | VC40635       | Million Mutant Project   |
| <i>oac-7</i> (gk586689)       | VC40345       | Million Mutant Project   |
| <i>oac-8</i> (gk211086)       | VC20046       | Million Mutant Project   |
| <i>oac-9</i> (gk662463)       | VC40490       | Million Mutant Project   |
| <i>oac-26</i> (WBVar00158777) | CB4856        | Wild isolate             |

## Supporting References

- [1] G. V. Markov, J. M. Meyer, O. Panda, A. B. Artyukhin, M. Claassen, H. Witte, F. C. Schroeder, R. J. Sommer, *Mol Biol Evol* **2016**, *33*, 2506-2514.
- [2] S. H. von Reuss, N. Bose, J. Srinivasan, J. J. Yim, J. C. Judkins, P. W. Sternberg, F. C. Schroeder, *J Am Chem Soc* **2012**, *134*, 1817–1824.
- [3] X. Zhang, L. Feng, S. Chinta, P. Singh, Y. Wang, J. K. Nunnery, R. A. Butcher, *Proc Natl Acad Sci USA* **2015**, *112*, 3955-3960.
- [4] G. J. Hermann, L. K. Schroeder, C. A. Hieb, A. M. Kershner, B. M. Rabbitts, P. Fonarev, B. D. Grant, J. R. Priess, *Mol Biol Cell* **2005**, *16*, 3273-3288.
- [5] A. B. Artyukhin, J. J. Yim, M. Cheong Cheong, L. Avery, *Sci Rep* **2015**, *5*, 10647.
